# Supplementary material
Source: publisher figshare collection journal article supplement (https://acs.figshare.com/ndownloader/files/14953775)
Supplement: Supplementary file 1 [file 14953775]

## Supporting Information

### **Binary adsorption equilibrium and breakthrough of *n*-butyl acetate and *p*-xylene on granular activated carbon**

Hong Sui <sup>a, b, c</sup>, Peng Jiang <sup>a, b, c</sup>, Xi Li <sup>d</sup>, Jijiang Liu <sup>a, b</sup>, Xingang Li <sup>a, b, c</sup>, Lin He <sup>a, b, \*</sup>

<sup>a</sup> *School of Chemical Engineering and Technology, Tianjin University, Tianjin 300072, China*

<sup>b</sup> *National Engineering Research Centre of Distillation Technology, Tianjin 300072, China*

<sup>c</sup> *Collaborative Innovation Center of Chemical Science and Engineering (Tianjin), 300072, China*

<sup>d</sup> *Department of Planning, Petrochina DaGang Petrochemical Company, Tianjin, 300280, China*

\* Corresponding author: Lin He

E-mail: linhe@tju.edu.cn

**Table S1.** Physical properties of VOC species.

| i component             | Formula                                       | Molar mass<br>(g/mol) | Boiling point <sup>a</sup><br>(°C) | Vapor pressure at 20°C <sup>a</sup><br>(kPa) | Dipolar moment <sup>b</sup><br>(D) | Density at 20°C <sup>a</sup><br>(g/cm <sup>3</sup> ) |
|-------------------------|-----------------------------------------------|-----------------------|------------------------------------|----------------------------------------------|------------------------------------|------------------------------------------------------|
| <i>n</i> -butyl acetate | C <sub>6</sub> H <sub>12</sub> O <sub>2</sub> | 116.16                | 127                                | 1.07                                         | 1.85                               | 0.88                                                 |
| <i>p</i> -xylene        | C <sub>8</sub> H <sub>10</sub>                | 106.17                | 138                                | 0.89                                         | 0.02                               | 0.86                                                 |

<sup>a</sup> data obtained from GESTIS Substance Database.

<sup>b</sup> data obtained from Shanghai Institute of Organic Chemistry of CAS. Chemistry Database [DB/OL].

**Table S2.** Operating conditions about pure component adsorption (temperature, T, 25 °C; adsorbent mass, W, 4.9 g; feed flow rate, Q, 0.75 Ndm<sup>3</sup>/min ; inlet pressure, P, 120 kPa).

| Single adsorbate        | Inlet concentration (ppm)               |
|-------------------------|-----------------------------------------|
| <i>n</i> -butyl acetate | 800, 1200, 1800, 2400, 2800, 4600, 5300 |
| <i>p</i> -xylene        | 800, 1200, 1400, 1800, 2400, 2800, 4200 |

**Table S3.** Operating conditions about *n*-butyl acetate/*p*-xylene mixture adsorption

(temperature, T, 25 °C; adsorbent mass, W, 4.9 g; inlet pressure, P, 120 kPa).

| Feed flow rate<br>(Ndm <sup>3</sup> /min) | Total concentration C <sub>t0</sub> <sup>a</sup><br>(ppm) | Feed fraction y <sub>10</sub> <sup>b</sup> |
|-------------------------------------------|-----------------------------------------------------------|--------------------------------------------|
| 0.75                                      | 2800                                                      | 0.25                                       |
| 0.75                                      | 2800                                                      | 0.32                                       |
| 0.75                                      | 2800                                                      | 0.39                                       |
| 0.75                                      | 2800                                                      | 0.61                                       |
| 0.75                                      | 2800                                                      | 0.71                                       |
| 0.75                                      | 2800                                                      | 0.82                                       |
| 0.75                                      | 2800                                                      | 0.50                                       |
| 0.75                                      | 3400                                                      | 0.50                                       |
| 0.75                                      | 2200                                                      | 0.50                                       |
| 0.75                                      | 1600                                                      | 0.50                                       |
| 0.45                                      | 2800                                                      | 0.50                                       |
| 0.60                                      | 2800                                                      | 0.50                                       |
| 0.90                                      | 2800                                                      | 0.50                                       |

<sup>a</sup> C<sub>t0</sub> is the sum of the inlet *n*-butyl acetate concentration C<sub>10</sub> and the inlet *p*-xylene concentration C<sub>20</sub>.

<sup>b</sup> y<sub>10</sub> is the mole ratio of *n*-butyl acetate concentration C<sub>10</sub> to the total concentration C<sub>t0</sub> in the feed.

**Table S4.** The fitting parameters of the Y-N model and the predicted penetration time.

| VOC species             | Initial<br>concentration | k <sub>YN</sub><br>(×10 <sup>-3</sup> min <sup>-1</sup> ) | τ<br>(min) | R <sup>2</sup> | t <sub>p</sub> <sup>a</sup><br>(min) |
|-------------------------|--------------------------|-----------------------------------------------------------|------------|----------------|--------------------------------------|
| <i>n</i> -butyl acetate | 1800                     | 25.5                                                      | 344        | 0.998          | 129                                  |
|                         | 2400                     | 28.3                                                      | 307        | 0.998          | 104                                  |
|                         | 4600                     | 42.1                                                      | 205        | 0.995          | 54                                   |
|                         | 5300                     | 46.3                                                      | 163        | 0.999          | 22                                   |
| <i>p</i> -xylene        | 1400                     | 20.5                                                      | 512        | 0.996          | 225                                  |
|                         | 1800                     | 27.1                                                      | 363        | 0.994          | 139                                  |
|                         | 2400                     | 34.2                                                      | 305        | 0.996          | 118                                  |
|                         | 4200                     | 45.4                                                      | 220        | 0.999          | 67                                   |

## **The isosteric heats of adsorption of *n*-butyl acetate and *p*-xylene on activated carbon**

Based on the adsorption isotherms of *n*-butyl acetate and *p*-xylene with different temperatures (288 K, 298 K, 308 K), the isosteric heats of adsorption on the activated carbon were calculated by using the Clausius-Clapeyron equation. **Figure S1** shows the isosteric heats of adsorption plotted as a function of adsorption uptake. It is noted that the isosteric heat of adsorption of *p*-xylene on the activated carbon decreases with the increase in the adsorption capacity because of the energetic heterogeneity of the adsorbent surface<sup>1</sup>. However, the isosteric heat of adsorption of *n*-butyl acetate increases with loading, suggesting that the lateral interactions between adsorbed *n*-butyl acetate molecules dominate while the adsorbate-adsorbent interaction energy relatively maintain steady. A similar result for C<sub>2</sub>H<sub>6</sub> adsorption on NaX zeolite were reported by Dunne et al.<sup>2</sup>. Most importantly, the adsorption heat of *p*-xylene (47.1-64.2 kJ·mol<sup>-1</sup>) is apparently larger than that of *n*-butyl acetate (9.0-27.5 kJ·mol<sup>-1</sup>). This result indicates that the adsorption affinity of *p*-xylene is greater than that of *n*-butyl acetate on granular activated carbon.

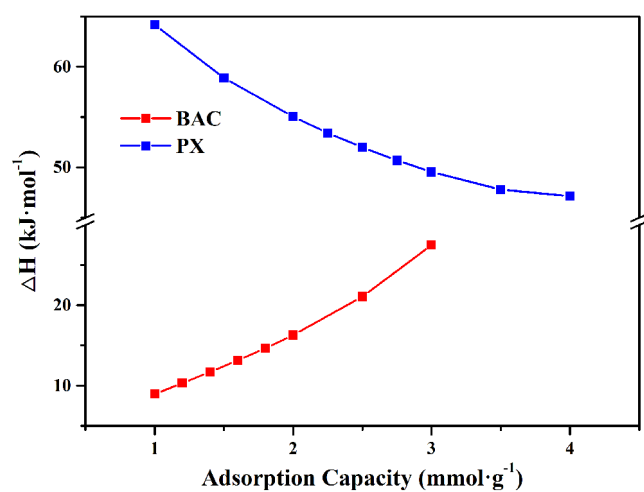

**Figure S1.** The isosteric heats of adsorption on activated carbon.

## Reference

1. Sircar, S.; Cao, D. Heat of adsorption. *Chem. Eng. Technol.* **2002**, *25* (10), 945-948.
2. Dunne, J.; Rao, M.; Sircar, S.; Gorte, R.; Myers, A. Calorimetric heats of adsorption and adsorption isotherms. 2. O<sub>2</sub>, N<sub>2</sub>, Ar, CO<sub>2</sub>, CH<sub>4</sub>, C<sub>2</sub>H<sub>6</sub>, and SF<sub>6</sub> on NaX, H-ZSM-5, and Na-ZSM-5 zeolites. *Langmuir* **1996**, *12* (24), 5896-5904.
